# Supplementary material
Source: publisher figshare collection journal article supplement (https://tandf.figshare.com/articles/dataset/_/6973643)
Supplement: Supplementary file 2 [file 2]

Archive with 3 entries (3 files):
- CMPHMM_Rcode.zip
- Readme.pdf
- TScounts_datafiles.zip
